# Supplementary material for: Dissecting the Satellite DNA Landscape in Three Cactophilic Drosophila Sequenced Genomes
Source: PubMed Central journal article supplement (PMC5555486; doi:10.1534/g3.117.042093), 2017-06-28
Supplement: 2831File002.pdf [file 2831File002.pdf]

## Supplementary Material

### Supplementary Figures Legends:

**Fig. S1.** Repetitive clusters (n=122) in *D. buzzatii* identified by RepeatExplorer after clusterization of 270366 reads. Together, these clusters represent 14.7% of the genome (identified by the yellow traced line). Each bar in the graphic represents a cluster of similar reads. The pBuM-1 and CDSTR198 satellite DNAs are indicated.

**Fig. S2.** Repetitive clusters (n=328) in *D. seriema* identified by RepeatExplorer after clusterization of 526010 reads. Together, these clusters represent 26.9% of the genome (identified by the yellow traced line). Each bar in the graphic represents a cluster of similar reads. The pBuM-2, DBC-150 and *CDSTR138* satellite DNAs are indicated.

**Fig. S3.** Repetitive clusters (n=217) in *D. mojavensis* identified by RepeatExplorer after clusterization of 323342 reads. Together, these clusters represent 14.9% of the genome (identified by the yellow traced line). Each bar in the graphic represents a cluster of similar reads. The *CDSTR130* and pBuM-1 satellite DNAs are indicated.

**Fig. S4.** SatDNA consensus sequences from *D. buzzatii*, *D. seriema* and *D. mojavensis*.

**Fig. S5. FISH** on polytene chromosomes: **(A)** *CDSTR130* (green) and *pBuM* (red) satDNAs probes on *D. mojavensis*, and **(B)** *CDSTR138* satDNA probe (red) on *D. seriema*.

### Supplementary Tables Legends:

**Table S1.** List of primers used in the present study.

**Table S2.** Description of all clusters retrieved from 1834708 reads of *D. buzzatii* by RepeatExplorer. The satDNA families analyzed in this study are highlighted in bold red.

**Table S3.** Description of all clusters retrieved from 2144275 reads of *D. seriema* by RepeatExplorer. The satDNA families analyzed in this study are highlighted in bold red.

**Table S4.** Description of all clusters retrieved from 2174346 reads of *D. mojavensis* by RepeatExplorer. The satDNA families analyzed in this study are highlighted in bold red.

**Table S5.** Description of the ten most abundant clusters of the *D. melanogaster* genome identified by RepeatExplorer. The satDNA families with monomer lengths smaller than 50 bp are highlighted in bold.

**Table S6.** Main features of 37 *CDSTR198* arrays located on euchromatic regions and their chromosome location according to GenomeBrowser analysis.

**Table S7.** List of genes associated with *CDSTR198* arrays and their relative positions in relation to *CDSTR198*.

Supplementary Figure 1.

*D. buzzatii*

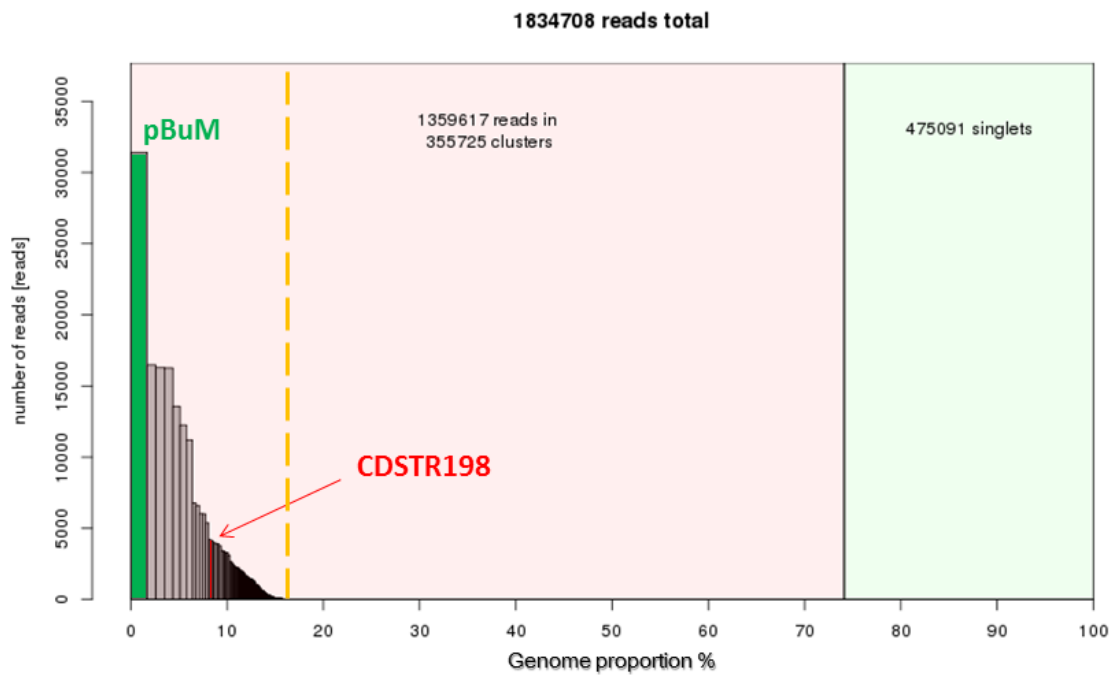

**Fig. S1.** Repetitive clusters (n=122) in *D. buzzatii* identified by RepeatExplorer after clusterization of 270366 reads. Together, these clusters represent 14.7% of the genome (identified by the yellow traced line). Each bar in the graphic represents a cluster of similar reads. The pBuM-1 and CDSTR198 satellite DNAs are indicated.

Supplementary Figure 2.

*D. seriema*

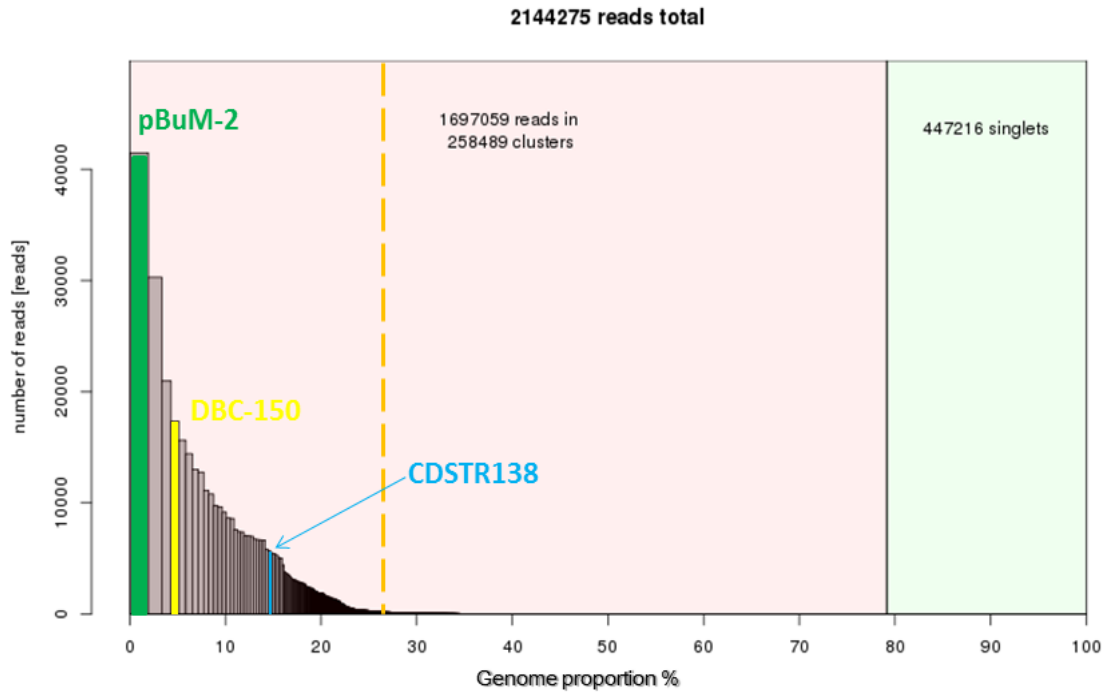

**Fig. S2.** Repetitive clusters (n=328) in *D. seriema* identified by RepeatExplorer after clusterization of 526010 reads. Together, these clusters represent 26.9% of the genome (identified by the yellow traced line). Each bar in the graphic represents a cluster of similar reads. The pBuM-2, DBC-150 and *CDSTR138* satellite DNAs are indicated.

### Supplementary Figure 3

#### *D. mojavensis*

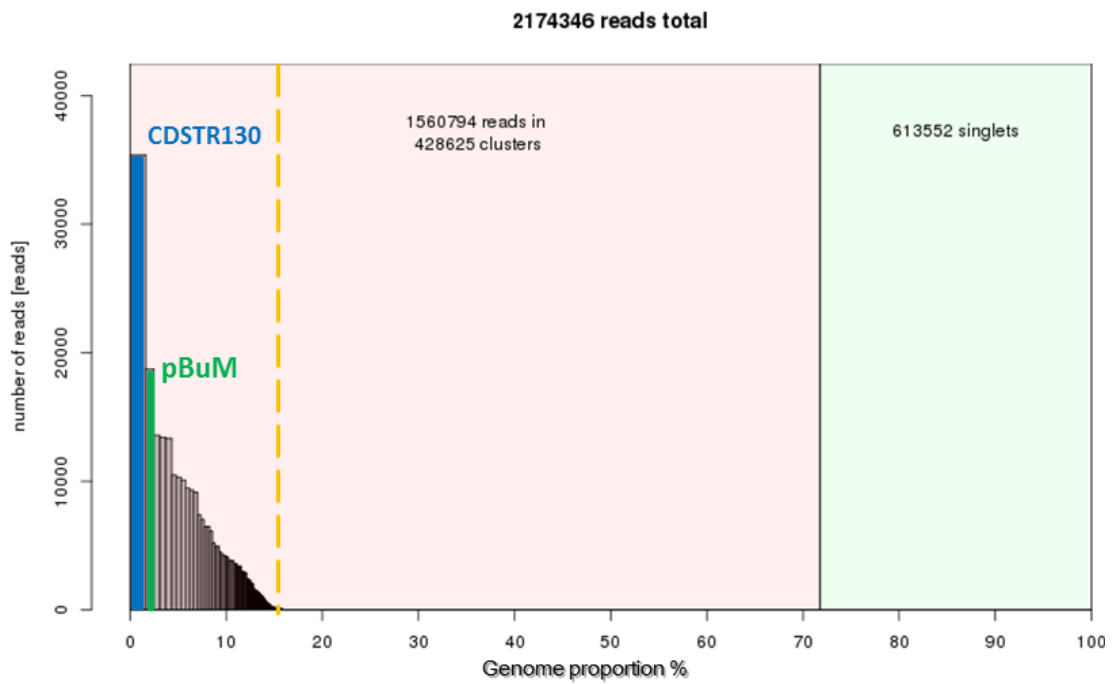

**Fig. S3.** Repetitive clusters (n=217) in *D. mojavensis* identified by RepeatExplorer after clusterization of 323342 reads. Together, these clusters represent 14.9% of the genome (identified by the yellow traced line). Each bar in the graphic represents a cluster of similar reads. The *CDSTR130* and pBuM-1 satellite DNAs are indicated.

#### Supplementary Figure 4

```
>CDSTR130_SatDNA_D.mojavensis_MF170235
CAATAGAGAAAAATTGCAAAATGTGATGGAAAAATCAAAAAAGCAAAGGGATTTTATATTTTAAAG
CTTTGATAACAAAATATTGAAAGATATTCGGCAATAAACTGGTAAATATTG

>CDSTR138_SatDNA_D.seriema_MF170236
CAACTGTTGATTTTTGTATATAGAATACGAATAAAATCAAATATATGGTGTAGAAGAGTATATTTG
CGCCGATTTACCATGAACATAACACTAGTTTGATTTTTTATTCATTTATAGTGAGTATAGGCATAT
CTGGGC

>CDSTR198_SatDNA_D.buzzatii_MF170237
AAGGTAGAAAGGTAGTTGGTGTAGATAAACCAGAAAAAGAGCTAAAAACGGCTAAAAACGGCTAGAA
AATAGCCAGAAAGGTAGATTGAACATTAATGGGCAAATGGATGGATAAATAAGACTGGTCATCATC
CAATGAACAGAATCATGATTAAGAGATAGAAATATGATTAGAAAAGTAGGATAGAAAAGGTTAGAAAG

>pBuM-1a_SatDNA_D.buzzatii_MF170238
GCAAAAGACTCCGTC AATTAGAAAACAAAAAATGTTATAGTTTTGAGGATTAACCGGCAAAAACCG
TATTATTTGTCATTTGATTTCTTTATGGAATACCGTTTTAGAAAGCGTCTTTTATCGTATTACTCAG
ATATATCTTAAGATTTAGCATAATCTAAGAACTTTTTGAAATATTCACATTTGTCCA

>pBuM-1b_SatDNA_D.buzzatii_Y_MF170239
TAA AATTACTACTTGAAACTAGAAAGAAAAGAAAGTTATAGTTTTGAGGTTTAACCGGCAAAAATC
GTATTATTTATCATTAGATTTCTTTATAGCATGCCGTTTATAAGCGTGTCTTATCGGATTATTCAG
ATATATTGCAAAATTTAACATAGCTCGAGACCTTTTTGAAATATTAACATTAATCCA

>pBuM-1_SatDNA_D.mojavensis_MF170240
CCTGAAATGCGGTATAAGATCAGAAAATTGACTTTTTTCTATGTATAACAGGCAATAACAGGACTA
TTTCGGGGCCGATTTTCAGTACGACTTTCTTTGTTGGAAGCATCTTTTAGAGCCCTATCTATTGACG
TATTCAGATTTTCAATGGGCCAACAACCTTTTTGAAATATTTACATTATTATCCC
```

**Fig. S4.** satDNA consensus sequences from *D. buzzatii*, *D. seriema* and *D. mojavensis*.

Supplementary Figure 5.

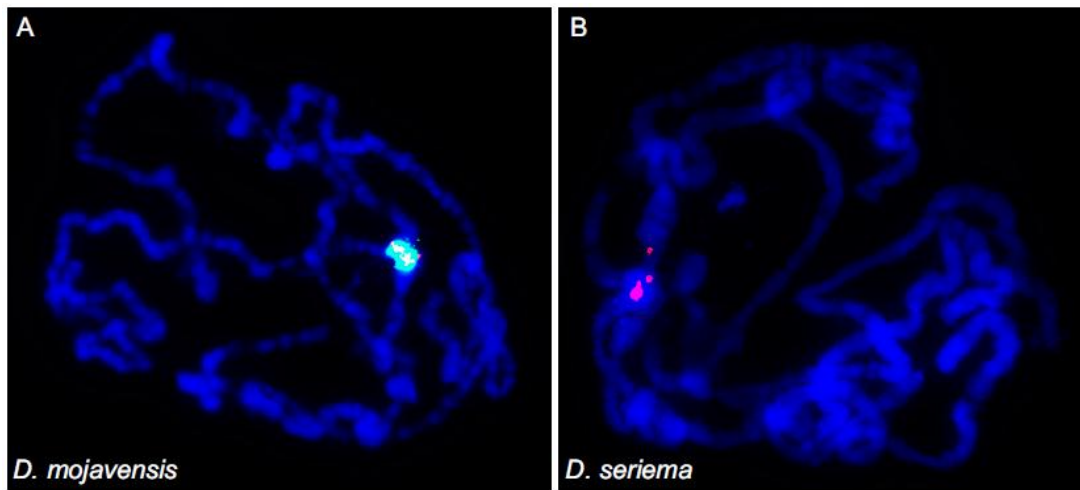

**Fig. S5. FISH** on polytene chromosomes: (A) *CDSTR130* (green) and *pBuM* (red) satDNAs probes on *D. mojavensis*, and (B) *CDSTR138* satDNA probe (red) on *D. seriema*.

**Supplementary Table 1.** List of primers used in the present study.

|                      | <b>Primer sets</b> | <b>Primer sequences</b>                                           |
|----------------------|--------------------|-------------------------------------------------------------------|
| <i>D. buzzatii</i>   | <i>pBuM-a</i>      | Fwd: CAATTAGAAAACAGGAAATTG<br>Rev: GACGGAGTCTTTTGCTGGACAA         |
|                      | <i>pBuM-1b</i>     | Fwd: GAAACTAGAAGGAAATAAACG<br>Rev: CAAGGAGTCCTTTTATGGATTA         |
|                      | <i>CDSTR198</i>    | Fwd: GGTAGATTGAACACTAATGGGC<br>Rev: CCTTTCTGCCTTTTTTCTAGCCG       |
| <i>D. seriema</i>    | <i>CDSTR138</i>    | Fwd:CCGATTTTCCATGAACATAACC<br>Rev: CGCAAATATACTCTACTACACC         |
| <i>D. mojavensis</i> | <i>CDSTR130</i>    | Fwd: CAATAGAGGCAAATGAATTTAG<br>Rev: CATTACTAACCAGTTTATTGCCG       |
|                      | <i>pBuM-1a</i>     | Fwd: GCCGATTTTCAGTACGACTTACTTCG<br>Rev: CCAGAAATAGTCCTGTTATTGCCTG |

**Table S2.** Description of all clusters retrieved from 1834708 reads of *D. buzzatii* by RepeatExplorer. The satDNA families analyzed in this study are highlighted in bold red.

| Cluster | Genome Proportion % | RepeatMasker Annotation | Reads number on each cluster | Outside reads with similarity % |
|---------|---------------------|-------------------------|------------------------------|---------------------------------|
| CL1     | <b>1.710</b>        | <b><i>pBuM-1</i></b>    | <b>31409</b>                 | <b>0.00038</b>                  |
| CL2     | 0.898               | RC.Helitron             | 16475                        | 0.19870                         |
| CL3     | 0.888               | DNA.hAT.Pegasus         | 16285                        | 2.70400                         |
| CL4     | 0.886               | DNA.hAT.hobo            | 16263                        | 3.69400                         |
| CL5     | 0.739               | Helitron                | 13567                        | 4.80500                         |
| CL6     | 0.668               | RC.Helitron             | 12252                        | 8.96000                         |
| CL7     | 0.611               | Non-LTR CR1             | 11208                        | 0.11510                         |
| CL8     | 0.370               | Galileo                 | 6790                         | 0.55450                         |
| CL9     | 0.360               | Homo6                   | 6601                         | 6.44000                         |
| CL10    | 0.328               | LINE-like               | 6024                         | 0.03731                         |
| CL11    | 0.327               | Galileo                 | 6007                         | 0.49990                         |
| CL12    | 0.294               | rRNA                    | 5393                         | 0.05911                         |
| CL13    | <b>0.229</b>        | <b><i>CDSTR198</i></b>  | <b>4202</b>                  | <b>0.00650</b>                  |
| CL14    | 0.226               | Unclassified            | 4142                         | 0.08527                         |
| CL15    | 0.217               | LTR BEL                 | 3982                         | 0.06588                         |
| CL16    | 0.215               | PERI                    | 3940                         | 2.02800                         |
| CL17    | 0.213               | LTR BEL                 | 3914                         | 0.30090                         |
| CL18    | 0.205               | Galileo/Helitron        | 3766                         | 6.62800                         |
| CL19    | 0.188               | rRNA                    | 3442                         | 0.16500                         |
| CL20    | 0.185               | LTRGypsy                | 3387                         | 0.08860                         |
| CL21    | 0.181               | Non-LTR_R1              | 3317                         | 0.05204                         |
| CL22    | 0.179               | LTR Gypsy/Minicopia     | 3290                         | 0.05014                         |
| CL23    | 0.170               | LTR Gypsy               | 3122                         | 0.03179                         |
| CL24    | 0.145               | LTR BEL                 | 2653                         | 0.04116                         |
| CL25    | 0.143               | LTR Gypsy               | 2622                         | 0.42640                         |
| CL26    | 0.136               | LTR Osvaldo             | 2493                         | 0.12570                         |
| CL27    | 0.129               | PARISa                  | 2364                         | 0.08243                         |
| CL28    | 0.125               | INVADER6_I              | 2292                         | 0.14160                         |
| CL29    | 0.124               | LTR BEL                 | 2279                         | 0.42260                         |
| CL30    | 0.121               | Galileo                 | 2214                         | 0.29560                         |
| CL31    | 0.120               | LTR Copia               | 2198                         | 0.28850                         |
| CL32    | 0.113               | LTR Gypsy               | 2070                         | 0.13140                         |
| CL33    | 0.110               | RC.Helitron             | 2025                         | 0.28540                         |
| CL34    | 0.109               | LTR Osvaldo             | 1996                         | 0.06629                         |
| CL35    | 0.104               | Unclassified            | 1917                         | 0.27710                         |
| CL36    | 0.100               | Unclassified            | 1835                         | 0.05137                         |
| CL37    | 0.095               | Non-LTR Jockey          | 1736                         | 0.02687                         |
| CL38    | 0.089               | LTR BEL                 | 1640                         | 0.57820                         |
| CL39    | 0.089               | Non-LTR R1              | 1632                         | 0.21130                         |
| CL40    | 0.087               | LTORBEL                 | 1592                         | 0.02742                         |
| CL41    | 0.084               | Homo9                   | 1537                         | 0.29000                         |
| CL42    | 0.082               | LTR Gypsy               | 1501                         | 0.03540                         |



|             |       |                  |      |         |
|-------------|-------|------------------|------|---------|
| <b>CL43</b> | 0.079 | Non-LTR Jockey   | 1451 | 0.06051 |
| <b>CL44</b> | 0.078 | LTR Copia        | 1437 | 0.00347 |
| <b>CL45</b> | 0.078 | Non-LTR Jockey   | 1428 | 0.02450 |
| <b>CL46</b> | 0.077 | LTR Copia        | 1411 | 0.11840 |
| <b>CL47</b> | 0.074 | Non-LTR_I        | 1351 | 0.07546 |
| <b>CL48</b> | 0.073 | DNA.TcMar.Tc1    | 1340 | 0.52960 |
| <b>CL49</b> | 0.069 | Non-LTR Jockey   | 1260 | 0.38600 |
| <b>CL50</b> | 0.061 | Unclassified     | 1126 | 0.12680 |
| <b>CL51</b> | 0.059 | Non-LTR Jockey   | 1076 | 0.23030 |
| <b>CL52</b> | 0.058 | LTR BEL          | 1066 | 0.03978 |
| <b>CL53</b> | 0.056 | LTR Copia        | 1019 | 0.15520 |
| <b>CL54</b> | 0.055 | DNA.CMC.Transib  | 1015 | 0.49800 |
| <b>CL55</b> | 0.054 | LTR Gypsy        | 987  | 0.00000 |
| <b>CL56</b> | 0.053 | Non-LTR RTE.BovB | 982  | 0.00000 |
| <b>CL57</b> | 0.050 | LTR Gypsy        | 909  | 0.12640 |
| <b>CL58</b> | 0.049 | DNA.TcMar.Tc1    | 891  | 0.20170 |
| <b>CL59</b> | 0.045 | Non-LTR Jockey   | 828  | 0.03882 |
| <b>CL60</b> | 0.043 | DNA.hAT-9        | 795  | 0.06751 |
| <b>CL61</b> | 0.038 | Unclassified     | 705  | 0.68000 |
| <b>CL62</b> | 0.038 | RNA              | 699  | 0.00454 |
| <b>CL63</b> | 0.037 | RC.Helitron      | 687  | 0.09555 |
| <b>CL64</b> | 0.035 | LTR Copia        | 644  | 0.00000 |
| <b>CL65</b> | 0.035 | DNA.hAT.hobo     | 639  | 0.30280 |
| <b>CL66</b> | 0.035 | LTR Copia        | 636  | 0.07575 |
| <b>CL67</b> | 0.034 | LTR Gypsy        | 627  | 0.10790 |
| <b>CL68</b> | 0.034 | Unclassified     | 625  | 0.19720 |
| <b>CL69</b> | 0.033 | Galileo          | 604  | 0.25630 |
| <b>CL70</b> | 0.030 | DNA.TcMar.Tc1    | 560  | 0.07143 |
| <b>CL71</b> | 0.030 | RC.Helitron      | 543  | 0.03627 |
| <b>CL72</b> | 0.029 | Unclassified     | 530  | 0.00000 |
| <b>CL73</b> | 0.028 | DNA.TcMar.Tc1    | 509  | 0.22400 |
| <b>CL74</b> | 0.026 | Non-LTR Jockey   | 480  | 0.47450 |
| <b>CL75</b> | 0.026 | Unclassified     | 477  | 0.19390 |
| <b>CL76</b> | 0.025 | LTR Gypsy        | 450  | 0.00000 |
| <b>CL77</b> | 0.023 | LTR Copia        | 430  | 0.00000 |
| <b>CL78</b> | 0.023 | LTR Gypsy        | 429  | 0.36040 |
| <b>CL79</b> | 0.022 | DNA.hAT.Pegasus  | 412  | 0.08403 |
| <b>CL80</b> | 0.022 | Rep2-DF          | 396  | 0.13160 |
| <b>CL81</b> | 0.021 | LINE jockey      | 383  | 0.00000 |
| <b>CL82</b> | 0.021 | Unclassified     | 382  | 0.00000 |
| <b>CL83</b> | 0.021 | DNA.TcMar.Tc1    | 376  | 0.27770 |
| <b>CL84</b> | 0.020 | DNA.hAT.Ac       | 375  | 0.05963 |
| <b>CL85</b> | 0.020 | LTR Copia        | 368  | 0.04246 |
| <b>CL86</b> | 0.019 | LTR Gypsy        | 344  | 0.28300 |
| <b>CL87</b> | 0.018 | DNA.TcMar.Tc1    | 335  | 0.38710 |
| <b>CL88</b> | 0.018 | LTRGypsy         | 333  | 0.05133 |
| <b>CL89</b> | 0.018 | LTR Copia        | 332  | 0.07948 |
| <b>CL90</b> | 0.017 | LTR Gypsy        | 314  | 0.33650 |

|              |       |                 |     |         |
|--------------|-------|-----------------|-----|---------|
| <b>CL91</b>  | 0.017 | LTR Gypsy       | 314 | 1.91400 |
| <b>CL92</b>  | 0.017 | DNA.PiggyBac    | 312 | 0.00000 |
| <b>CL93</b>  | 0.017 | LTR BEL         | 309 | 0.00000 |
| <b>CL94</b>  | 0.017 | DNA.hAT.hobo    | 309 | 0.05537 |
| <b>CL95</b>  | 0.017 | LTR Copia       | 307 | 0.20480 |
| <b>CL96</b>  | 0.016 | Non-LTR Jockey  | 299 | 0.32750 |
| <b>CL97</b>  | 0.016 | LTR Gypsy       | 298 | 0.15710 |
| <b>CL98</b>  | 0.016 | DNA.CMC.Transib | 297 | 1.41100 |
| <b>CL99</b>  | 0.016 | Non-LTR Jockey  | 293 | 0.00000 |
| <b>CL100</b> | 0.016 | DNA.TcMar.Tc1   | 291 | 0.47050 |
| <b>CL101</b> | 0.016 | LTR Gypsy       | 289 | 0.00000 |
| <b>CL102</b> | 0.015 | Unclassified    | 268 | 0.00000 |
| <b>CL103</b> | 0.015 | Unclassified    | 267 | 0.25610 |
| <b>CL104</b> | 0.014 | Unclassified    | 259 | 0.00000 |
| <b>CL105</b> | 0.014 | LTR Gypsy       | 249 | 0.07072 |
| <b>CL106</b> | 0.013 | LTR Gypsy       | 245 | 0.09872 |
| <b>CL107</b> | 0.013 | Unclassified    | 244 | 0.23550 |
| <b>CL108</b> | 0.013 | Unclassified    | 241 | 0.11280 |
| <b>CL109</b> | 0.013 | LTR Gypsy       | 235 | 0.41250 |
| <b>CL110</b> | 0.013 | LTR BEL         | 231 | 0.00000 |
| <b>CL111</b> | 0.012 | LTR Gypsy       | 223 | 0.16910 |
| <b>CL112</b> | 0.012 | DNA.TcMar.      | 221 | 0.20410 |
| <b>CL113</b> | 0.012 | DNA.TcMar.      | 220 | 0.81220 |
| <b>CL114</b> | 0.012 | DNA.TcMar.Tc1   | 213 | 0.72610 |
| <b>CL115</b> | 0.011 | LTR Gypsy       | 205 | 0.18590 |
| <b>CL116</b> | 0.011 | Unclassified    | 204 | 0.00000 |
| <b>CL117</b> | 0.011 | DNA Sola1-type  | 199 | 0.21910 |
| <b>CL118</b> | 0.011 | Unclassified    | 195 | 0.00000 |
| <b>CL119</b> | 0.011 | DNA.CMC.Transib | 194 | 2.55300 |
| <b>CL120</b> | 0.010 | LTR Gypsy       | 190 | 0.26460 |
| <b>CL121</b> | 0.010 | DNA.CMC.Transib | 189 | 0.10960 |
| <b>CL122</b> | 0.010 | LTR Gypsy       | 186 | 0.00000 |

**Table S3.** Description of all clusters retrieved from 2144275 reads of *D. seriema* by RepeatExplorer. The satDNA families analyzed in this study are highlighted in bold red.

| Cluster | Genome Proportion% | RepeatMasker Annotation | Reads number on each cluster | Outside reads with similarities % |
|---------|--------------------|-------------------------|------------------------------|-----------------------------------|
| CL1     | <b>1.930</b>       | <b>pBuM-2</b>           | <b>41472</b>                 | <b>0.176</b>                      |
| CL2     | 1.410              | RC.Helitron             | 30287                        | 24.010                            |
| CL3     | 0.978              | Homo6                   | 20966                        | 32.230                            |
| CL4     | <b>0.809</b>       | <b>DBC-150</b>          | <b>17349</b>                 | <b>0.784</b>                      |
| CL5     | 0.730              | RC.Helitron             | 15646                        | 26.060                            |
| CL6     | 0.673              | Non-LTR CR1             | 14427                        | 5.296                             |
| CL7     | 0.607              | PERI                    | 13026                        | 24.800                            |
| CL8     | 0.595              | RC.Helitron             | 12761                        | 42.540                            |
| CL9     | 0.519              | LTR Gypsy               | 11132                        | 2.677                             |
| CL10    | 0.504              | SSS139                  | 10798                        | 19.010                            |
| CL11    | 0.455              | Non-LTR R1              | 9753                         | 0.749                             |
| CL12    | 0.450              | Non-LTR R1              | 9650                         | 1.907                             |
| CL13    | 0.428              | LTR BEL                 | 9170                         | 2.345                             |
| CL14    | 0.403              | rRNA                    | 8643                         | 0.104                             |
| CL15    | 0.401              | Galileo                 | 8605                         | 6.392                             |
| CL16    | 0.355              | LTR Gypsy               | 7615                         | 2.232                             |
| CL17    | 0.345              | Unclassified            | 7408                         | 0.310                             |
| CL18    | 0.344              | Unclassified            | 7385                         | 0.163                             |
| CL19    | 0.329              | RC.Helitron             | 7044                         | 31.960                            |
| CL20    | 0.328              | Galileo                 | 7041                         | 9.260                             |
| CL21    | 0.326              | Non-LTR Jockey          | 6993                         | 2.331                             |
| CL22    | 0.314              | Non-LTR Jockey          | 6743                         | 4.968                             |
| CL23    | 0.313              | LTR BEL                 | 6705                         | 1.253                             |
| CL24    | 0.311              | Unclassified            | 6674                         | 1.049                             |
| CL25    | 0.311              | LTR BEL                 | 6658                         | 6.008                             |
| CL26    | 0.272              | LTR Gypsy               | 5826                         | 1.442                             |
| CL27    | <b>0.266</b>       | <b>CDSTR138</b>         | <b>5709</b>                  | <b>0.893</b>                      |
| CL28    | 0.257              | Non-LTR R1              | 5502                         | 3.017                             |
| CL29    | 0.253              | LTR Gypsy               | 5433                         | 4.013                             |
| CL30    | 0.249              | LTR Gypsy               | 5343                         | 1.029                             |
| CL31    | 0.238              | rRNA                    | 5094                         | 1.924                             |
| CL32    | 0.234              | LTR Copia               | 5022                         | 3.146                             |
| CL33    | 0.206              | rRNA                    | 4421                         | 3.936                             |
| CL34    | 0.176              | LTR Gypsy               | 3781                         | 1.878                             |
| CL35    | 0.171              | LTR BEL                 | 3663                         | 2.266                             |
| CL36    | 0.167              | LTR Gypsy               | 3583                         | 5.610                             |
| CL37    | 0.160              | Unclassified            | 3438                         | 2.967                             |
| CL38    | 0.152              | LTR Gypsy               | 3257                         | 2.395                             |
| CL39    | 0.147              | LTR Gypsy               | 3143                         | 6.713                             |
| CL40    | 0.144              | Unclassified            | 3082                         | 4.121                             |

|             |       |                                 |      |        |
|-------------|-------|---------------------------------|------|--------|
| <b>CL41</b> | 0.143 | LTR Copia                       | 3076 | 2.503  |
| <b>CL42</b> | 0.140 | LTR BEL                         | 3011 | 1.328  |
| <b>CL43</b> | 0.137 | LTR Gypsy                       | 2933 | 0.852  |
| <b>CL44</b> | 0.136 | RC.Helitron                     | 2910 | 0.687  |
| <b>CL45</b> | 0.133 | LTR Gypsy                       | 2856 | 2.066  |
| <b>CL46</b> | 0.132 | Unclassified                    | 2830 | 0.177  |
| <b>CL47</b> | 0.129 | LTR Gypsy                       | 2766 | 3.868  |
| <b>CL48</b> | 0.129 | Unclassified                    | 2759 | 8.191  |
| <b>CL49</b> | 0.123 | LTR Gypsy                       | 2647 | 2.909  |
| <b>CL50</b> | 0.115 | RC.Helitron/DNA.hAT.P<br>egasus | 2474 | 0.000  |
| <b>CL51</b> | 0.115 | Non-LTR I                       | 2473 | 3.275  |
| <b>CL52</b> | 0.114 | LTR BEL                         | 2440 | 3.238  |
| <b>CL53</b> | 0.111 | LTR Gypsy                       | 2378 | 0.925  |
| <b>CL54</b> | 0.111 | DNA.Ginger                      | 2373 | 6.153  |
| <b>CL55</b> | 0.109 | Unclassified                    | 2343 | 0.427  |
| <b>CL56</b> | 0.107 | LTR Gypsy                       | 2289 | 3.102  |
| <b>CL57</b> | 0.100 | LTR Gypsy                       | 2152 | 2.138  |
| <b>CL58</b> | 0.098 | Non-LTR Jockey                  | 2100 | 0.048  |
| <b>CL59</b> | 0.096 | Galileo                         | 2061 | 2.232  |
| <b>CL60</b> | 0.094 | LTR BEL                         | 2023 | 3.114  |
| <b>CL61</b> | 0.091 | LTR Gypsy                       | 1960 | 2.092  |
| <b>CL62</b> | 0.090 | LTR Gypsy                       | 1922 | 1.769  |
| <b>CL63</b> | 0.089 | RC.Helitron                     | 1919 | 1.928  |
| <b>CL64</b> | 0.089 | LTR Gypsy                       | 1910 | 1.571  |
| <b>CL65</b> | 0.089 | LTR Gypsy                       | 1899 | 2.791  |
| <b>CL66</b> | 0.088 | LTR Gypsy                       | 1895 | 3.219  |
| <b>CL67</b> | 0.088 | Non-LTR Jockey                  | 1883 | 1.009  |
| <b>CL68</b> | 0.085 | LTR Gypsy                       | 1832 | 4.039  |
| <b>CL69</b> | 0.082 | Non-LTR Jockey                  | 1758 | 2.446  |
| <b>CL70</b> | 0.079 | Non-LTR Jockey                  | 1698 | 4.005  |
| <b>CL71</b> | 0.078 | DNA.TcMar.Tc1                   | 1665 | 3.363  |
| <b>CL72</b> | 0.075 | LTR Gypsy                       | 1612 | 1.365  |
| <b>CL73</b> | 0.074 | Unclassified                    | 1596 | 0.125  |
| <b>CL74</b> | 0.074 | Unclassified                    | 1586 | 0.568  |
| <b>CL75</b> | 0.072 | Unclassified                    | 1555 | 0.000  |
| <b>CL76</b> | 0.072 | DNA.CMC.Transib                 | 1545 | 24.140 |
| <b>CL77</b> | 0.071 | LTR BEL                         | 1530 | 1.046  |
| <b>CL78</b> | 0.069 | LTR Gypsy                       | 1486 | 2.826  |
| <b>CL79</b> | 0.067 | DNA.hAT.Tip100                  | 1435 | 3.902  |
| <b>CL80</b> | 0.067 | DNA.TcMar.Tc1                   | 1429 | 2.799  |
| <b>CL81</b> | 0.066 | LTR ERVL                        | 1411 | 0.071  |
| <b>CL82</b> | 0.066 | Unclassified                    | 1406 | 0.854  |
| <b>CL83</b> | 0.065 | Non-LTR Jockey                  | 1400 | 0.643  |
| <b>CL84</b> | 0.064 | DNA.TcMar.Tc1                   | 1366 | 2.928  |
| <b>CL85</b> | 0.062 | LTR Copia                       | 1340 | 0.298  |

|              |       |                 |      |       |
|--------------|-------|-----------------|------|-------|
| <b>CL86</b>  | 0.061 | Galileo         | 1311 | 3.051 |
| <b>CL87</b>  | 0.061 | LTR Copia       | 1306 | 2.374 |
| <b>CL88</b>  | 0.059 | Non-LTR Jockey  | 1263 | 3.959 |
| <b>CL89</b>  | 0.059 | Non-LTR Jockey  | 1261 | 1.983 |
| <b>CL90</b>  | 0.057 | LTR Gypsy       | 1215 | 2.881 |
| <b>CL91</b>  | 0.056 | DNA.hAT.Ac      | 1200 | 5.917 |
| <b>CL92</b>  | 0.054 | Unclassified    | 1165 | 0.000 |
| <b>CL93</b>  | 0.054 | DNA.TcMar.Tc1   | 1163 | 4.729 |
| <b>CL94</b>  | 0.049 | Non-LTR RTE     | 1043 | 1.534 |
| <b>CL95</b>  | 0.048 | LTR Gypsy       | 1019 | 0.687 |
| <b>CL96</b>  | 0.045 | LTR Gypsy       | 969  | 0.516 |
| <b>CL97</b>  | 0.044 | LTR Gypsy       | 953  | 3.043 |
| <b>CL98</b>  | 0.044 | Unclassified    | 940  | 0.319 |
| <b>CL99</b>  | 0.044 | LTR Gypsy       | 934  | 0.107 |
| <b>CL100</b> | 0.043 | Unclassified    | 932  | 0.000 |
| <b>CL101</b> | 0.042 | LTR Gypsy       | 903  | 0.111 |
| <b>CL102</b> | 0.042 | DNA.Maverick    | 895  | 0.335 |
| <b>CL103</b> | 0.041 | Unclassified    | 869  | 0.115 |
| <b>CL104</b> | 0.038 | LTR Gypsy       | 810  | 2.469 |
| <b>CL105</b> | 0.037 | DNA.hAT.Pegasus | 800  | 4.625 |
| <b>CL106</b> | 0.037 | Unclassified    | 785  | 0.255 |
| <b>CL107</b> | 0.035 | Unclassified    | 749  | 0.000 |
| <b>CL108</b> | 0.033 | LTR Gypsy       | 715  | 2.378 |
| <b>CL109</b> | 0.033 | Unclassified    | 709  | 0.000 |
| <b>CL110</b> | 0.033 | Non-LTR R1      | 709  | 1.975 |
| <b>CL111</b> | 0.033 | LTR Copia       | 701  | 0.856 |
| <b>CL112</b> | 0.032 | Unclassified    | 688  | 0.000 |
| <b>CL113</b> | 0.030 | Unclassified    | 639  | 0.157 |
| <b>CL114</b> | 0.029 | Unclassified    | 631  | 0.000 |
| <b>CL115</b> | 0.029 | LTR Gypsy       | 625  | 3.520 |
| <b>CL116</b> | 0.029 | LTR Copia       | 624  | 3.526 |
| <b>CL117</b> | 0.029 | LTR Gypsy       | 623  | 3.371 |
| <b>CL118</b> | 0.029 | Unclassified    | 620  | 0.000 |
| <b>CL119</b> | 0.028 | Unclassified    | 605  | 0.000 |
| <b>CL120</b> | 0.028 | LTR Gypsy       | 600  | 1.167 |
| <b>CL121</b> | 0.028 | Non-LTR I       | 595  | 0.840 |
| <b>CL122</b> | 0.027 | Unclassified    | 585  | 0.000 |
| <b>CL123</b> | 0.027 | Unclassified    | 579  | 0.000 |
| <b>CL124</b> | 0.027 | DNA.PIF         | 575  | 0.000 |
| <b>CL125</b> | 0.026 | Unclassified    | 550  | 0.000 |
| <b>CL126</b> | 0.026 | Unclassified    | 549  | 0.000 |
| <b>CL127</b> | 0.025 | LTR Gypsy       | 541  | 0.000 |
| <b>CL128</b> | 0.025 | Galileo         | 532  | 4.511 |
| <b>CL129</b> | 0.025 | DNA.TcMar.Tc1   | 531  | 4.520 |
| <b>CL130</b> | 0.025 | LTR Copia       | 528  | 0.379 |
| <b>CL131</b> | 0.024 | RC.Helitron     | 521  | 0.000 |

|       |              |                 |            |              |
|-------|--------------|-----------------|------------|--------------|
| CL132 | 0.024        | LTR Gypsy       | 518        | 1.158        |
| CL133 | <b>0.024</b> | <b>CDSTR198</b> | <b>513</b> | <b>0.195</b> |
| CL134 | 0.024        | LTR Gypsy       | 503        | 0.000        |
| CL135 | 0.023        | LTR Copia       | 499        | 1.804        |
| CL136 | 0.023        | Unclassified    | 493        | 0.000        |
| CL137 | 0.022        | Unclassified    | 483        | 0.207        |
| CL138 | 0.022        | Unclassified    | 480        | 0.000        |
| CL139 | 0.022        | Unclassified    | 479        | 0.000        |
| CL140 | 0.022        | Galileo         | 476        | 4.202        |
| CL141 | 0.022        | Unclassified    | 470        | 0.000        |
| CL142 | 0.022        | Unclassified    | 467        | 0.214        |
| CL143 | 0.021        | DNA.TcMar.Tc1   | 449        | 3.786        |
| CL144 | 0.020        | Unclassified    | 438        | 0.000        |
| CL145 | 0.020        | Unclassified    | 436        | 0.000        |
| CL146 | 0.020        | Unclassified    | 436        | 0.000        |
| CL147 | 0.020        | LTR Gypsy       | 434        | 1.152        |
| CL148 | 0.020        | Unclassified    | 432        | 0.232        |
| CL149 | 0.020        | RC.Helitron     | 430        | 3.953        |
| CL150 | 0.020        | Non-LTR L1      | 429        | 0.000        |
| CL151 | 0.020        | LTR Gypsy       | 426        | 0.000        |
| CL152 | 0.020        | Unclassified    | 426        | 0.000        |
| CL153 | 0.020        | Unclassified    | 424        | 0.236        |
| CL154 | 0.020        | Unclassified    | 423        | 0.000        |
| CL155 | 0.020        | Unclassified    | 420        | 0.000        |
| CL156 | 0.020        | Unclassified    | 420        | 0.000        |
| CL157 | 0.020        | Unclassified    | 420        | 0.000        |
| CL158 | 0.019        | Unclassified    | 419        | 0.000        |
| CL159 | 0.019        | Non-LTR Jockey  | 412        | 1.456        |
| CL160 | 0.019        | RC.Helitron     | 410        | 2.439        |
| CL161 | 0.019        | DNA.hAT.hATm    | 410        | 0.000        |
| CL162 | 0.019        | DNA.hAT.hobo    | 409        | 1.711        |
| CL163 | 0.019        | Unclassified    | 407        | 0.000        |
| CL164 | 0.019        | Unclassified    | 405        | 0.000        |
| CL165 | 0.019        | Unclassified    | 404        | 0.000        |
| CL166 | 0.019        | Unclassified    | 399        | 0.000        |
| CL167 | 0.018        | LTR BEL         | 397        | 0.000        |
| CL168 | 0.018        | LTR Gypsy       | 396        | 0.505        |
| CL169 | 0.018        | Unclassified    | 394        | 0.000        |
| CL170 | 0.018        | LTR BEL         | 394        | 1.523        |
| CL171 | 0.018        | Unclassified    | 392        | 0.000        |
| CL172 | 0.018        | Unclassified    | 389        | 0.000        |
| CL173 | 0.018        | Unclassified    | 387        | 0.000        |
| CL174 | 0.018        | DNA.CMC.Transib | 387        | 8.010        |
| CL175 | 0.018        | Unclassified    | 383        | 0.000        |
| CL176 | 0.018        | Unclassified    | 381        | 0.000        |
| CL177 | 0.018        | Unclassified    | 380        | 0.000        |

|              |       |                 |     |       |
|--------------|-------|-----------------|-----|-------|
| <b>CL178</b> | 0.018 | Unclassified    | 379 | 0.000 |
| <b>CL179</b> | 0.018 | Unclassified    | 379 | 0.000 |
| <b>CL180</b> | 0.017 | DNA.TcMar.Tc1   | 374 | 1.337 |
| <b>CL181</b> | 0.017 | Unclassified    | 373 | 0.000 |
| <b>CL182</b> | 0.017 | Unclassified    | 371 | 0.000 |
| <b>CL183</b> | 0.017 | Unclassified    | 370 | 0.000 |
| <b>CL184</b> | 0.017 | Unclassified    | 369 | 0.000 |
| <b>CL185</b> | 0.017 | DNA.TcMar.Tc1   | 365 | 1.370 |
| <b>CL186</b> | 0.017 | Unclassified    | 365 | 0.000 |
| <b>CL187</b> | 0.017 | Unclassified    | 365 | 0.000 |
| <b>CL188</b> | 0.017 | Unclassified    | 365 | 0.000 |
| <b>CL189</b> | 0.017 | DNA.hAT         | 365 | 0.000 |
| <b>CL190</b> | 0.017 | DNA.CMC.Transib | 364 | 0.000 |
| <b>CL191</b> | 0.017 | Unclassified    | 364 | 0.000 |
| <b>CL192</b> | 0.017 | Unclassified    | 364 | 0.000 |
| <b>CL193</b> | 0.017 | Unclassified    | 363 | 0.000 |
| <b>CL194</b> | 0.017 | Unclassified    | 358 | 0.000 |
| <b>CL195</b> | 0.017 | LTR Copia       | 356 | 0.281 |
| <b>CL196</b> | 0.017 | Unclassified    | 356 | 0.000 |
| <b>CL197</b> | 0.017 | Unclassified    | 354 | 0.000 |
| <b>CL198</b> | 0.017 | Unclassified    | 353 | 0.000 |
| <b>CL199</b> | 0.017 | Unclassified    | 353 | 0.000 |
| <b>CL200</b> | 0.016 | Unclassified    | 349 | 0.286 |
| <b>CL201</b> | 0.016 | rDNA            | 349 | 0.000 |
| <b>CL202</b> | 0.016 | tRNA            | 349 | 0.000 |
| <b>CL203</b> | 0.016 | Unclassified    | 349 | 0.000 |
| <b>CL204</b> | 0.016 | Unclassified    | 348 | 0.000 |
| <b>CL205</b> | 0.016 | Unclassified    | 347 | 0.000 |
| <b>CL206</b> | 0.016 | Unclassified    | 346 | 0.000 |
| <b>CL207</b> | 0.016 | Unclassified    | 344 | 0.000 |
| <b>CL208</b> | 0.016 | LTR BEL         | 343 | 0.000 |
| <b>CL209</b> | 0.016 | Unclassified    | 339 | 0.000 |
| <b>CL210</b> | 0.016 | Unclassified    | 337 | 0.000 |
| <b>CL211</b> | 0.016 | Unclassified    | 335 | 0.000 |
| <b>CL212</b> | 0.015 | Unclassified    | 332 | 0.000 |
| <b>CL213</b> | 0.015 | Unclassified    | 331 | 0.000 |
| <b>CL214</b> | 0.015 | Unclassified    | 328 | 0.000 |
| <b>CL215</b> | 0.015 | Unclassified    | 328 | 0.000 |
| <b>CL216</b> | 0.015 | Unclassified    | 326 | 0.000 |
| <b>CL217</b> | 0.015 | LTR ERVK        | 326 | 0.000 |
| <b>CL218</b> | 0.015 | Unclassified    | 324 | 0.000 |
| <b>CL219</b> | 0.015 | Unclassified    | 323 | 0.000 |
| <b>CL220</b> | 0.015 | Unclassified    | 323 | 0.000 |
| <b>CL221</b> | 0.015 | Unclassified    | 319 | 0.000 |
| <b>CL222</b> | 0.015 | Unclassified    | 313 | 0.000 |
| <b>CL223</b> | 0.015 | Unclassified    | 312 | 0.000 |

|              |       |                 |     |       |
|--------------|-------|-----------------|-----|-------|
| <b>CL224</b> | 0.015 | Unclassified    | 311 | 0.000 |
| <b>CL225</b> | 0.015 | Unclassified    | 311 | 0.000 |
| <b>CL226</b> | 0.015 | Unclassified    | 311 | 0.000 |
| <b>CL227</b> | 0.014 | Unclassified    | 308 | 0.000 |
| <b>CL228</b> | 0.014 | Unclassified    | 304 | 0.000 |
| <b>CL229</b> | 0.014 | DNA.CMC.Chapaev | 304 | 0.000 |
| <b>CL230</b> | 0.014 | Unclassified    | 302 | 0.000 |
| <b>CL231</b> | 0.014 | Unclassified    | 300 | 0.000 |
| <b>CL232</b> | 0.014 | Unclassified    | 300 | 0.000 |
| <b>CL233</b> | 0.014 | Unclassified    | 299 | 0.000 |
| <b>CL234</b> | 0.014 | LTR Gypsy       | 299 | 0.000 |
| <b>CL235</b> | 0.014 | Unclassified    | 299 | 0.000 |
| <b>CL236</b> | 0.014 | Unclassified    | 298 | 0.000 |
| <b>CL237</b> | 0.014 | Unclassified    | 296 | 0.000 |
| <b>CL238</b> | 0.014 | Non-LTR CR1     | 296 | 0.000 |
| <b>CL239</b> | 0.014 | DNA.CMC.EnSpm   | 295 | 0.000 |
| <b>CL240</b> | 0.014 | Unclassified    | 295 | 0.000 |
| <b>CL241</b> | 0.014 | Unclassified    | 292 | 0.000 |
| <b>CL242</b> | 0.014 | Unclassified    | 291 | 0.000 |
| <b>CL243</b> | 0.013 | Unclassified    | 289 | 0.000 |
| <b>CL244</b> | 0.013 | Non-LTR I       | 287 | 0.000 |
| <b>CL245</b> | 0.013 | Unclassified    | 287 | 0.000 |
| <b>CL246</b> | 0.013 | Unclassified    | 286 | 0.000 |
| <b>CL247</b> | 0.013 | Unclassified    | 286 | 0.000 |
| <b>CL248</b> | 0.013 | Unclassified    | 283 | 0.000 |
| <b>CL249</b> | 0.013 | DNA.TcMar.Tc    | 282 | 2.482 |
| <b>CL250</b> | 0.013 | Unclassified    | 279 | 0.000 |
| <b>CL251</b> | 0.013 | LTR Copia       | 277 | 0.000 |
| <b>CL252</b> | 0.013 | Unclassified    | 276 | 0.000 |
| <b>CL253</b> | 0.013 | Unclassified    | 274 | 0.000 |
| <b>CL254</b> | 0.013 | Unclassified    | 274 | 0.000 |
| <b>CL255</b> | 0.013 | Unclassified    | 273 | 0.000 |
| <b>CL256</b> | 0.013 | Unclassified    | 273 | 0.000 |
| <b>CL257</b> | 0.013 | Unclassified    | 273 | 0.000 |
| <b>CL258</b> | 0.013 | Unclassified    | 273 | 0.000 |
| <b>CL259</b> | 0.013 | DNA.Maverick    | 271 | 1.107 |
| <b>CL260</b> | 0.013 | Unclassified    | 268 | 0.000 |
| <b>CL261</b> | 0.013 | DNA.PiggyBac    | 268 | 0.746 |
| <b>CL262</b> | 0.013 | Unclassified    | 267 | 0.000 |
| <b>CL263</b> | 0.012 | Unclassified    | 265 | 0.000 |
| <b>CL264</b> | 0.012 | Unclassified    | 264 | 0.000 |
| <b>CL265</b> | 0.012 | Unclassified    | 263 | 0.000 |
| <b>CL266</b> | 0.012 | Unclassified    | 263 | 0.000 |
| <b>CL267</b> | 0.012 | Unclassified    | 262 | 0.000 |
| <b>CL268</b> | 0.012 | Unclassified    | 261 | 0.000 |
| <b>CL269</b> | 0.012 | Unclassified    | 259 | 0.000 |



|              |       |                  |     |       |
|--------------|-------|------------------|-----|-------|
| <b>CL270</b> | 0.012 | Unclassified     | 259 | 0.000 |
| <b>CL271</b> | 0.012 | Unclassified     | 257 | 0.000 |
| <b>CL272</b> | 0.012 | LTR Gypsy        | 257 | 0.000 |
| <b>CL273</b> | 0.012 | Unclassified     | 255 | 0.000 |
| <b>CL274</b> | 0.012 | Unclassified     | 254 | 0.000 |
| <b>CL275</b> | 0.012 | LTR ERVK         | 254 | 0.000 |
| <b>CL276</b> | 0.012 | Unclassified     | 253 | 0.000 |
| <b>CL277</b> | 0.012 | Unclassified     | 251 | 0.000 |
| <b>CL278</b> | 0.012 | Unclassified     | 251 | 0.000 |
| <b>CL279</b> | 0.012 | Unclassified     | 250 | 0.000 |
| <b>CL280</b> | 0.012 | Unclassified     | 250 | 0.000 |
| <b>CL281</b> | 0.012 | Unclassified     | 248 | 0.000 |
| <b>CL282</b> | 0.011 | Unclassified     | 247 | 0.000 |
| <b>CL283</b> | 0.011 | Unclassified     | 246 | 0.000 |
| <b>CL284</b> | 0.011 | Unclassified     | 245 | 0.000 |
| <b>CL285</b> | 0.011 | Unclassified     | 245 | 0.000 |
| <b>CL286</b> | 0.011 | Unclassified     | 244 | 0.000 |
| <b>CL287</b> | 0.011 | Unclassified     | 243 | 0.000 |
| <b>CL288</b> | 0.011 | Unclassified     | 243 | 0.411 |
| <b>CL289</b> | 0.011 | Unclassified     | 241 | 0.000 |
| <b>CL290</b> | 0.011 | Unclassified     | 240 | 0.000 |
| <b>CL291</b> | 0.011 | Unclassified     | 238 | 0.000 |
| <b>CL292</b> | 0.011 | Unclassified     | 238 | 0.000 |
| <b>CL293</b> | 0.011 | LTR Copia        | 238 | 0.840 |
| <b>CL294</b> | 0.011 | Unclassified     | 237 | 0.000 |
| <b>CL295</b> | 0.011 | Unclassified     | 237 | 0.000 |
| <b>CL296</b> | 0.011 | Unclassified     | 236 | 0.000 |
| <b>CL297</b> | 0.011 | Unclassified     | 235 | 0.000 |
| <b>CL298</b> | 0.011 | Unclassified     | 235 | 0.000 |
| <b>CL299</b> | 0.011 | Unclassified     | 234 | 0.000 |
| <b>CL300</b> | 0.011 | Unclassified     | 234 | 0.000 |
| <b>CL301</b> | 0.011 | Unclassified     | 234 | 0.000 |
| <b>CL302</b> | 0.011 | Unclassified     | 233 | 0.000 |
| <b>CL303</b> | 0.011 | Unclassified     | 233 | 0.000 |
| <b>CL304</b> | 0.011 | Unclassified     | 231 | 0.000 |
| <b>CL305</b> | 0.011 | Unclassified     | 230 | 0.000 |
| <b>CL306</b> | 0.011 | Unclassified     | 229 | 0.000 |
| <b>CL307</b> | 0.011 | Unclassified     | 227 | 0.000 |
| <b>CL308</b> | 0.011 | DNA.PIF.ISL2EU   | 226 | 0.000 |
| <b>CL309</b> | 0.011 | Unclassified     | 226 | 0.000 |
| <b>CL310</b> | 0.011 | Unclassified     | 225 | 0.000 |
| <b>CL311</b> | 0.011 | Unclassified     | 225 | 0.000 |
| <b>CL312</b> | 0.010 | Unclassified     | 224 | 0.000 |
| <b>CL313</b> | 0.010 | Unclassified     | 224 | 0.000 |
| <b>CL314</b> | 0.010 | Non-LTR Penelope | 224 | 0.000 |
| <b>CL315</b> | 0.010 | Unclassified     | 223 | 0.000 |

|              |       |              |     |       |
|--------------|-------|--------------|-----|-------|
| <b>CL316</b> | 0.010 | Unclassified | 222 | 0.000 |
| <b>CL317</b> | 0.010 | LTR Gypsy    | 221 | 0.000 |
| <b>CL318</b> | 0.010 | Unclassified | 221 | 0.000 |
| <b>CL319</b> | 0.010 | Unclassified | 220 | 0.000 |
| <b>CL320</b> | 0.010 | Unclassified | 219 | 0.000 |
| <b>CL321</b> | 0.010 | Non-LTR CR1  | 219 | 0.000 |
| <b>CL322</b> | 0.010 | Unclassified | 219 | 0.000 |
| <b>CL323</b> | 0.010 | Unclassified | 218 | 0.000 |
| <b>CL324</b> | 0.010 | Unclassified | 218 | 0.000 |
| <b>CL325</b> | 0.010 | Unclassified | 218 | 0.459 |
| <b>CL326</b> | 0.010 | Unclassified | 218 | 0.000 |
| <b>CL327</b> | 0.010 | Unclassified | 216 | 0.000 |
| <b>CL328</b> | 0.010 | Unclassified | 214 | 0.000 |

**Table S4.** Description of all clusters retrieved from 2174346 reads of *D. mojavensis* by RepeatExplorer. The satDNA families analyzed in this study are highlighted in bold red.

| Cluster | Genome<br>Proportion % | RepeatMasker<br>Annotation | Reads<br>number on<br>each cluster | Outside reads<br>with<br>similarity % |
|---------|------------------------|----------------------------|------------------------------------|---------------------------------------|
| CL1     | <b>1.630</b>           | <b><i>CDSTR130</i></b>     | <b>35395</b>                       | <b>0.494</b>                          |
| CL2     | <b>0.861</b>           | <b><i>pBuM</i></b>         | <b>18724</b>                       | <b>0.417</b>                          |
| CL3     | 0.625                  | RC.Helitron                | 13585                              | 41.430                                |
| CL4     | 0.616                  | Homo6                      | 13402                              | 45.750                                |
| CL5     | 0.614                  | RC.Helitron                | 13345                              | 42.750                                |
| CL6     | 0.482                  | Homo6                      | 10483                              | 33.900                                |
| CL7     | 0.475                  | RC.Helitron                | 10323                              | 42.020                                |
| CL8     | 0.464                  | Non-LTR Jockey             | 10096                              | 0.366                                 |
| CL9     | 0.435                  | RC.Helitron                | 9461                               | 21.380                                |
| CL10    | 0.429                  | Galileo                    | 9320                               | 2.157                                 |
| CL11    | 0.420                  | Non-LTR R1                 | 9132                               | 1.818                                 |
| CL12    | 0.340                  | RC.Helitron                | 7382                               | 31.140                                |
| CL13    | 0.323                  | Unclassified               | 7027                               | 0.896                                 |
| CL14    | 0.299                  | RC.Helitron                | 6496                               | 3.079                                 |
| CL15    | 0.298                  | Non-LTR R1                 | 6480                               | 0.972                                 |
| CL16    | 0.281                  | LTR BEL                    | 6119                               | 0.082                                 |
| CL17    | 0.239                  | Unclassified               | 5196                               | 0.019                                 |
| CL18    | 0.227                  | Non-LTR R1                 | 4944                               | 3.621                                 |
| CL19    | 0.227                  | Non-LTR CR1                | 4935                               | 2.411                                 |
| CL20    | 0.208                  | Non-LTR Jockey             | 4515                               | 0.975                                 |
| CL21    | 0.200                  | rRNA                       | 4355                               | 0.987                                 |
| CL22    | 0.194                  | LTR BEL                    | 4216                               | 0.427                                 |
| CL23    | 0.194                  | Non-LTR R1                 | 4208                               | 0.048                                 |
| CL24    | 0.188                  | PERI                       | 4096                               | 29.050                                |
| CL25    | 0.178                  | Non-LTR Jockey             | 3860                               | 0.130                                 |
| CL26    | 0.177                  | LTR Gypsy                  | 3856                               | 0.778                                 |
| CL27    | 0.175                  | Non-LTR Jockey             | 3814                               | 0.000                                 |
| CL28    | 0.166                  | Non-LTR Jockey<br>/TART    | 3605                               | 3.523                                 |
| CL29    | 0.166                  | rRNA                       | 3601                               | 1.000                                 |
| CL30    | 0.157                  | LTR Gypsy                  | 3420                               | 1.637                                 |
| CL31    | 0.157                  | LTR Gypsy                  | 3409                               | 0.264                                 |
| CL32    | 0.156                  | LTR BEL                    | 3392                               | 0.884                                 |
| CL33    | 0.138                  | LTR Gypsy                  | 3007                               | 0.200                                 |
| CL34    | 0.137                  | LTR Gypsy                  | 2978                               | 0.000                                 |
| CL35    | 0.135                  | RC.Helitron                | 2925                               | 9.983                                 |
| CL36    | 0.132                  | LTR Gypsy                  | 2867                               | 1.604                                 |
| CL37    | 0.111                  | RC.Helitron                | 2413                               | 2.445                                 |
| CL38    | 0.110                  | DNA.hAT.Ac                 | 2399                               | 0.125                                 |
| CL39    | 0.107                  | Rep2-DF                    | 2337                               | 2.696                                 |

|             |       |                   |      |       |
|-------------|-------|-------------------|------|-------|
| <b>CL40</b> | 0.106 | LTR Copia         | 2302 | 0.174 |
| <b>CL41</b> | 0.097 | DNA.TcMar.Tc1     | 2103 | 3.281 |
| <b>CL42</b> | 0.094 | LTR BEL           | 2045 | 1.125 |
| <b>CL43</b> | 0.093 | DNA.TcMar.Tc1     | 2032 | 1.280 |
| <b>CL44</b> | 0.077 | DNA.TcMar.Tc1     | 1681 | 0.833 |
| <b>CL45</b> | 0.072 | LTR BEL           | 1570 | 3.694 |
| <b>CL46</b> | 0.072 | Unclassified      | 1559 | 1.668 |
| <b>CL47</b> | 0.071 | DNA.CMC.Transib   | 1540 | 0.779 |
| <b>CL48</b> | 0.069 | LTR Gypsy         | 1492 | 0.335 |
| <b>CL49</b> | 0.067 | LTR Gypsy         | 1448 | 0.691 |
| <b>CL50</b> | 0.063 | Unclassified      | 1379 | 2.321 |
| <b>CL51</b> | 0.062 | DNA.hAT.Tip100    | 1360 | 2.426 |
| <b>CL52</b> | 0.062 | Unclassified      | 1358 | 0.074 |
| <b>CL53</b> | 0.059 | Unclassified      | 1284 | 0.000 |
| <b>CL54</b> | 0.054 | LTR Gypsy         | 1177 | 1.359 |
| <b>CL55</b> | 0.053 | Non-LTR R1        | 1164 | 0.172 |
| <b>CL56</b> | 0.052 | Non-LTR Jockey    | 1126 | 0.178 |
| <b>CL57</b> | 0.051 | Unclassified      | 1105 | 0.000 |
| <b>CL58</b> | 0.050 | LTR BEL           | 1093 | 0.366 |
| <b>CL59</b> | 0.049 | Galileo           | 1066 | 1.876 |
| <b>CL60</b> | 0.048 | LTR BEL           | 1045 | 0.766 |
| <b>CL61</b> | 0.041 | Non-LTR Jockey    | 883  | 1.133 |
| <b>CL62</b> | 0.040 | LTR Gypsy         | 870  | 0.575 |
| <b>CL63</b> | 0.040 | LTR Gypsy         | 869  | 0.000 |
| <b>CL64</b> | 0.037 | DNA.TcMar.Mariner | 804  | 0.746 |
| <b>CL65</b> | 0.036 | DNA.TcMar.Tc1     | 780  | 0.000 |
| <b>CL66</b> | 0.034 | DNA.TA-1          | 731  | 1.231 |
| <b>CL67</b> | 0.033 | DNA-1_RPr         | 724  | 0.000 |
| <b>CL68</b> | 0.030 | LTR Gypsy         | 661  | 1.210 |
| <b>CL69</b> | 0.030 | RC.Helitron       | 657  | 0.457 |
| <b>CL70</b> | 0.029 | Non-LTR Jockey    | 627  | 0.478 |
| <b>CL71</b> | 0.026 | LTR BEL           | 565  | 1.593 |
| <b>CL72</b> | 0.026 | LTR Gypsy         | 562  | 0.000 |
| <b>CL73</b> | 0.025 | Unclassified      | 537  | 0.000 |
| <b>CL74</b> | 0.024 | LTR Gypsy         | 527  | 0.000 |
| <b>CL75</b> | 0.024 | Non-LTR Jockey    | 518  | 1.158 |
| <b>CL76</b> | 0.023 | DNA.TcMar.Tc1     | 502  | 0.398 |
| <b>CL77</b> | 0.023 | LTR ERV1          | 496  | 0.202 |
| <b>CL78</b> | 0.022 | DNA.TcMar.Tc1     | 482  | 5.394 |
| <b>CL79</b> | 0.022 | DNA.TcMar.Tc1     | 472  | 0.424 |
| <b>CL80</b> | 0.021 | rDNA              | 454  | 0.000 |
| <b>CL81</b> | 0.020 | LTR BEL           | 442  | 0.226 |
| <b>CL82</b> | 0.020 | DNA.piggyBac      | 441  | 1.134 |
| <b>CL83</b> | 0.020 | DNA.TcMar.        | 438  | 1.598 |
| <b>CL84</b> | 0.019 | Non-LTR Jockey    | 417  | 0.000 |
| <b>CL85</b> | 0.018 | Non-LTR CR1       | 381  | 7.612 |

|              |       |                   |     |        |
|--------------|-------|-------------------|-----|--------|
| <b>CL86</b>  | 0.017 | Non-LTR Jockey    | 367 | 0.273  |
| <b>CL87</b>  | 0.017 | Non-LTR Jockey    | 362 | 0.276  |
| <b>CL88</b>  | 0.016 | LTR Gypsy         | 354 | 1.412  |
| <b>CL89</b>  | 0.014 | Unclassifeid      | 310 | 18.710 |
| <b>CL90</b>  | 0.014 | LINE              | 298 | 0.000  |
| <b>CL91</b>  | 0.013 | DNA.hAT.Ac        | 293 | 0.341  |
| <b>CL92</b>  | 0.013 | DNA.hAT.Pegasus   | 289 | 2.422  |
| <b>CL93</b>  | 0.013 | DNA.hAT.hobo      | 288 | 3.819  |
| <b>CL94</b>  | 0.013 | LTR Gypsy         | 282 | 0.000  |
| <b>CL95</b>  | 0.013 | DNA.TcMar.Tc1     | 278 | 2.158  |
| <b>CL96</b>  | 0.013 | LTR Gypsy         | 273 | 0.000  |
| <b>CL97</b>  | 0.012 | Unclassifeid      | 256 | 0.000  |
| <b>CL98</b>  | 0.012 | Unclassifeid      | 255 | 0.000  |
| <b>CL99</b>  | 0.011 | Unclassifeid      | 248 | 0.000  |
| <b>CL100</b> | 0.011 | Non-LTR Jockey    | 244 | 0.410  |
| <b>CL101</b> | 0.011 | LTR BEL           | 243 | 0.000  |
| <b>CL102</b> | 0.011 | DNA.PIF.Harbinger | 242 | 1.653  |
| <b>CL103</b> | 0.011 | DNA.TcMar.Tc1     | 237 | 1.266  |
| <b>CL104</b> | 0.011 | LTR Gypsy         | 235 | 0.425  |
| <b>CL105</b> | 0.010 | DNA.CMC.Transib   | 226 | 0.443  |
| <b>CL106</b> | 0.010 | DNA.hAT.hobo      | 224 | 3.125  |
| <b>CL107</b> | 0.010 | DNA.hAT.Pegasus   | 217 | 3.687  |
| <b>CL108</b> | 0.010 | Unclassified      | 217 | 0.000  |
| <b>CL109</b> | 0.010 | DNA.TcMar.Tc1     | 217 | 0.461  |

**Table S5.** Description of the ten most abundant clusters of the *D. melanogaster* genome identified by RepeatExplorer. The satDNA families with monomer lengths smaller than 50 bp are highlighted in bold.

| Cluster   | Sequence Annotation | Monomer size (bp) | Genome proportion % | Number of reads on each cluster |
|-----------|---------------------|-------------------|---------------------|---------------------------------|
| <b>1</b>  | <b>TGTTATTCTA</b>   | <b>10</b>         | <b>1.750</b>        | <b>86909</b>                    |
| <b>2</b>  | <b>AGAGA</b>        | <b>5</b>          | <b>0.715</b>        | <b>35548</b>                    |
| <b>3</b>  | <i>1.688</i>        | 360               | 0.551               | 27393                           |
| <b>4</b>  | <b>AGACA</b>        | <b>5</b>          | <b>0.484</b>        | <b>24099</b>                    |
| <b>5</b>  | <i>1.688</i>        | 360               | 0.453               | 22558                           |
| <b>6</b>  | <i>1.688</i>        | 360               | 0.437               | 21759                           |
| <b>7</b>  | <i>dodeca</i>       | <b>11-12</b>      | <b>0.380</b>        | <b>18912</b>                    |
| <b>8</b>  | <i>1.688</i>        | 360               | 0.340               | 16906                           |
| <b>9</b>  | <i>Responder</i>    | 240               | 0.323               | 16044                           |
| <b>10</b> | LTR-Gypsy           | -                 | 0.293               | 14577                           |

**Table S6.** Main features of 37 *CDSTR198* arrays located on euchromatic regions and their chromosome location according to GenomeBrowser analysis.

| <b>Contig</b> | <b>Array Size (bp)</b> | <b>Copy number</b> | <b>Scaffold</b> | <b>Chromosome</b> |
|---------------|------------------------|--------------------|-----------------|-------------------|
| <i>713</i>    | 300                    | 1,51               | 1               | 2                 |
| <i>714</i>    | 521                    | 2,63               | 1               | 2                 |
| <i>834</i>    | 643                    | 3,24               | 1               | 2                 |
| <i>894</i>    | 563                    | 2,84               | 1_2             | 2                 |
| <i>1013</i>   | 585                    | 2,95               | 1_2             | 2                 |
| <i>1263</i>   | 908                    | 4,58               | 2               | 2                 |
| <i>1281</i>   | 462                    | 2,33               | 2               | 2                 |
| <i>1732</i>   | 557                    | 2,81               | 1_2             | 2                 |
| <i>2138</i>   | 348                    | 1,75               | 6               | 3                 |
| <i>2239</i>   | 912                    | 4,6                | 6               | 3                 |
| <i>2290</i>   | 814                    | 4,1                | 6               | 3                 |
| <i>3200</i>   | 1044                   | 5,27               | 11              | 4                 |
| <i>4011</i>   | 884                    | 4,46               | 13              | 5                 |
| <i>4217</i>   | 627                    | 3,16               | 14              | 5                 |
| <i>4994</i>   | 243                    | 1,22               | 22              | 4                 |
| <i>5012</i>   | 530                    | 2,67               | 22              | 4                 |
| <i>5199</i>   | 608                    | 3,07               | 18_1            | 3                 |
| <i>5294</i>   | 450                    | 2,27               | 18_1            | 3                 |
| <i>5693</i>   | 741                    | 3,74               | 18_2            | 3                 |
| <i>6645</i>   | 233                    | 1,17               | 28              | X                 |
| <i>6973</i>   | 804                    | 4,06               | 22              | 4                 |
| <i>8355</i>   | 287                    | 1,45               | 40              | 4                 |
| <i>8688</i>   | 625                    | 3,15               | 41              | 5                 |
| <i>8952</i>   | 405                    | 2,04               | 31              | 4                 |
| <i>9897</i>   | 499                    | 2,52               | 52              | 2                 |
| <i>12072</i>  | 243                    | 1,22               | 6               | 3                 |
| <i>12476</i>  | 659                    | 3,33               | 83              | 3                 |
| <i>13070</i>  | 678                    | 3,42               | 24              | 3                 |
| <i>13095</i>  | 680                    | 3,43               | 24              | 3                 |
| <i>13237</i>  | 652                    | 3,29               | 68              | 5                 |
| <i>14801</i>  | 521                    | 2,63               | 121             | 5                 |
| <i>15065</i>  | 692                    | 3,49               | 123             | 4                 |
| <i>16146</i>  | 616                    | 3,11               | 174             | Unmapped          |
| <i>18240</i>  | 404                    | 2,04               | 111             | 5                 |
| <i>20000</i>  | 607                    | 3,06               | 18              | 3                 |
| <i>27251</i>  | 322                    | 1,62               | 2               | 2                 |
| <i>31812</i>  | 196                    | 0,99               | 2               | 2                 |

**Table S7.** List of genes associated with *CDSTR198* arrays and their relative positions in relation to *CDSTR198*.

| Contig | Array Size (bp) | Position of <i>CDSTR198</i> relative to gene | Distance of <i>CDSTR198</i> array to gene | Gene annotation                                        |  | <i>D. melanogaster</i> orthologous | Scaffold/ chromosome |
|--------|-----------------|----------------------------------------------|-------------------------------------------|--------------------------------------------------------|--|------------------------------------|----------------------|
| 714    | 521             | Intron                                       | -                                         | EVM prediction scaffold1.763                           |  | FBpp0082178                        | 1/2                  |
| 894    | 563             | Intron                                       | -                                         | EVM prediction scaffold1.1077                          |  | FBpp0111784                        | 1/2                  |
| 1013   | 585             | Intron                                       | -                                         | EVM prediction scaffold1.1420                          |  | FBpp0303067                        | 1/2                  |
| 2138   | 348             | Intron                                       | -                                         | EVM prediction scaffold6.61                            |  | FBpp0080953                        | 6/3                  |
| 4011   | 884             | 5'                                           | 1.4 kb                                    | EVM prediction scaffold13.141                          |  | FBpp0167799                        | 13/5                 |
| 4217   | 627             | 5'                                           | 750 bp                                    | FBpp0170282                                            |  | -                                  | 14/5                 |
| 5012   | 530             | 5'                                           | 500 bp                                    | EVM prediction scaffold22.170                          |  | -                                  | 22/4                 |
| 5199   | 608             | 5'                                           | 4 kb                                      | Gene.g4503.tl                                          |  | -                                  | 18/3                 |
| 6645   | 233             | 5'                                           | 3 kb                                      | EVM prediction scaffold28.31                           |  | FBpp0073879                        | 28/X                 |
| 6973   | 804             | 5'                                           | 800 bp                                    | EVM prediction scaffold22.28                           |  | FBpp0072761                        | 22/4                 |
| 8355   | 287             | 5'                                           | 1.9 kb                                    | EVM prediction scaffold40.3                            |  | FBpp0072462                        | 40/4                 |
| 8688   | 625             | Intron                                       | -                                         | EVM prediction scaffold41.61                           |  | FBpp0112268                        | 41/5                 |
| 8952   | 405             | 5'                                           | 500 bp                                    | EVM prediction scaffold31.206                          |  | FBpp0079016                        | 31/4                 |
| 13070  | 678             | 5'                                           | 800 bp                                    | EVM prediction scaffold24_1.4                          |  | -                                  | 24/3                 |
| 13095  | 680             | 5'                                           | 300 bp                                    | SNAPPosition:scaffold24_prediction gene_268763..270446 |  | -*                                 | 24/3                 |
| 14801  | 521             | 5'                                           | 3,9 kb                                    | EVM prediction scaffold121.6                           |  | FBpp0074830                        | 121/5                |

\*This predicted gene has no orthologous on *D. melanogaster* or *D. mojavensis* according to *Drosophila buzzatii* Genome Project (<http://dbuz.uab.cat>; Guillen et al. 2015)
